# Supplementary material
Source: PubMed Central journal article supplement (PMC5631168)
Supplement: supp_WNL.0000000000004538_e-tables.pdf [file supp_WNL.0000000000004538_e-tables.pdf]

---

**Table e-1. ICD-9-CM Codes Used To Define Sepsis and Organ Dysfunction**

---

**ICD-9-CM codes for sepsis as defined by Dombrovskiy**

038 Septicemia  
038.0 Streptococcal septicemia  
038.1 Staphylococcal septicemia  
038.2 Pneumococcal septicemia  
038.3 Septicemia due to anaerobes  
038.4 Septicemia due to other gram-negative organisms  
038.8 Other specified septicemias  
038.9 Unspecified septicemia  
995.92 Severe sepsis  
995.91 Inflammatory response due to infection without organ dysfunction  
003.1 *Salmonella* septicemia  
020.2 Septicemic plague  
022.3 Anthrax septicemia  
036.2 Meningococcal septicemia  
036.3 Waterhouse-Friderichsen syndrome  
054.5 Herpetic septicemia  
098.89 Gonococemia  
112.5 Systemic candidiasis  
785.52 Septic shock

**ICD-9-CM codes for organ dysfunction**

*Respiratory*

518.5 Pulmonary insufficiency after trauma, shock, or surgery  
518.81 Acute respiratory failure  
518.82 ARDS  
518.84 Acute and chronic respiratory failure  
518.85 ARDS after trauma, shock, or surgery  
786.09 Respiratory abnormality not otherwise specified  
799.1 Respiratory arrest  
96.7 Continuous mechanical ventilation unspecified duration  
96.71 Continuous mechanical ventilation <96 h  
96.72 Continuous mechanical ventilation 96+ h

*Cardiovascular*

427.5 Cardiac arrest  
458.0 Hypotension (458.2, 458.8, and 458.9)  
785.50 Shock not otherwise specified  
785.51 Shock, cardiogenic  
785.52 Septic shock  
785.59 Shock without trauma  
796.3 Low blood pressure, nonspecific

*Renal*

580 Acute glomerulonephritis (580.4, 580.0, 580.81, 580.89, and 580.9)  
584 Acute renal failure (includes 584.5, 584.6, 584.7, 584.8, and 584.9)

*Hepatic*

570 Acute necrosis of liver  
572.2 Hepatic coma  
573.3 Hepatitis, unspecified; not due to virus, congestion, or infarction

*Hematologic*

286.6 Purpura fulminans  
286.9 Coagulopathy  
287.3 Primary thrombocytopenia  
287.4 Secondary thrombocytopenia  
287.5 Thrombocytopenia, unspecified

*Metabolic*

276.2 Acidosis, metabolic or lactic

*Neurologic*

293.0 Acute delirium  
293.1 Subacute delirium  
293.9 Transient organic mental disorder not otherwise specified  
348.1 Anoxic brain injury  
348.3 Encephalopathy, unspecified  
348.31 Septic encephalopathy  
348.39 Other encephalopathy  
780.01 Coma  
780.09 Stupor

*Other*

995.92 Severe sepsis (sepsis with acute organ dysfunction)

**Table e-2. Distribution of ICD-9-CM Codes 435.x Among Patients Diagnosed with Seizure**

| <b>Code</b> | <b>Patients with Sepsis<br/>(N = 30,503)</b> | <b>Patients without Sepsis<br/>(N = 696,924)</b> |
|-------------|----------------------------------------------|--------------------------------------------------|
| 345.9x      | 82.7%                                        | 81.8%                                            |
| 345.3x      | 6.2%                                         | 3.0%                                             |
| 345.1x      | 4.6%                                         | 6.5%                                             |
| 345.8x      | 2.8%                                         | 3.1%                                             |
| 345.5x      | 1.9%                                         | 2.7%                                             |
| 345.4x      | 0.8%                                         | 1.6%                                             |
| 345.7x      | 0.4%                                         | 0.2%                                             |
| 345.0x      | 0.4%                                         | 0.9%                                             |
| 345.2x      | <0.1%                                        | 0.1%                                             |
| 345.6x      | <0.1%                                        | <0.1%                                            |
